# Supplementary material for: Functional principal component analysis as a new methodology for the analysis of the impact of two rehabilitation protocols in functional recovery after stroke
Source: PubMed Central journal article supplement (PMC4246446; doi:10.1186/1743-0003-11-134), 2014-09-10

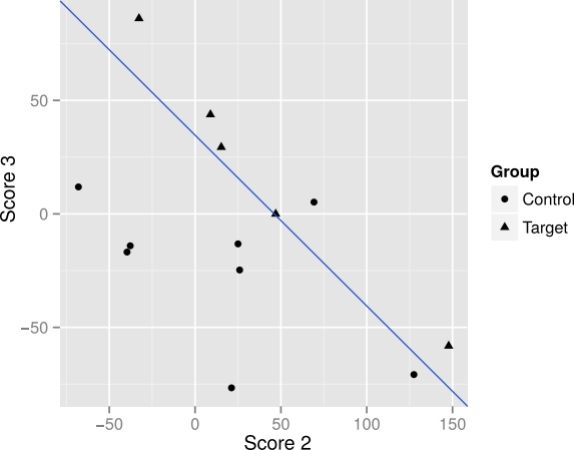

Supplement: 12984_2014_673_MOESM2_ESM.pdf [file 12984_2014_673_MOESM2_ESM.pdf]
